1 **Morphogenesis of the islets of Langerhans is guided by extra-endocrine Slit2/3 signals**

2

3

4 Jennifer M. Gilbert<sup>1</sup>, Melissa T. Adams<sup>1</sup>, Nadav Sharon<sup>2</sup>, Hariharan Jayaraaman<sup>1</sup>, Barak Blum<sup>1\*</sup>

5

6

7 <sup>1</sup>Department of Cell and Regenerative Biology, University of Wisconsin-Madison School of Medicine  
8 and Public Health, 1111 Highland Avenue, Madison, WI 53705, USA.

9 <sup>2</sup>Department of Stem Cell and Regenerative Biology, Harvard University, 7 Divinity Avenue, Cambridge,  
10 MA, 02138, USA.

11

12 \*Corresponding author: Barak Blum; [bblum4@wisc.edu](mailto:bblum4@wisc.edu)

13 **Abstract**

14 The spatial architecture of the islets of Langerhans is vitally important for their correct function, and  
15 alterations in islet morphogenesis often result in diabetes mellitus. We have previously reported that  
16 Roundabout (Robo) receptors are required for proper islet morphogenesis. As part of the Slit-Robo  
17 signaling pathway, Robo receptors work in conjunction with Slit ligands to mediate axon guidance, cell  
18 migration, and cell positioning in development. However, the role of Slit ligands in islet morphogenesis  
19 has not yet been determined. Here we report that Slit ligands are expressed in overlapping and distinct  
20 patterns in both endocrine and non-endocrine tissues in late pancreas development. We show that  
21 function of either Slit2 or Slit3, which are predominantly expressed in the pancreatic mesenchyme, is  
22 required and sufficient for islet morphogenesis, while Slit1, which is predominantly expressed in the  $\beta$   
23 cells, is dispensable for islet morphogenesis. We further show that Slit functions as a repellent signal to  
24  $\beta$  cells. These data suggest that clustering of endocrine cells during islet morphogenesis is guided, at  
25 least in part, by repelling Slit2/3 signals from the pancreatic mesenchyme.

## 26 Introduction

27 Blood glucose homeostasis is regulated in the pancreas by clusters of endocrine cells called the islets of  
28 Langerhans. Islets consist of five different endocrine cell types ( $\alpha$ ,  $\beta$ ,  $\delta$ , PP,  $\epsilon$ ), which secrete glucagon,  
29 insulin, somatostatin, pancreatic polypeptide, and ghrelin, respectively. Murine islets exhibit a distinct  
30 cytoarchitecture consisting of a core of  $\beta$ -cells, surrounded by a mantle of  $\alpha$ -,  $\delta$ -, PP- and  $\epsilon$ -cells. The  $\beta$ -  
31 cell core makes up roughly 80% of the islet mass, while the four other cell types make up the remaining  
32 20% (Kim et al., 2009; Steiner et al., 2010). This cytoarchitecture is thought to be important for proper  
33 islet function, and loss of this architectural makeup is described in obesity and diabetes in both mice  
34 and humans (Baetens et al., 1978; Cabrera et al., 2006; Kilimnik et al., 2011; Roscioni et al., 2016).  
35 While the architectural features of islets have been well-documented, the mechanisms controlling the  
36 formation this architecture are still largely unknown.

37 The Slit-Robo signaling pathway has roles in a number of developmental processes, primarily axon  
38 guidance, cell movement, and cell adhesion (Blockus and Chédotal, 2016; Chédotal, 2007; Wu et al.,  
39 2017; Ypsilanti and Chedotal, 2014; Ypsilanti et al., 2010). Slit ligand binding to Robo receptors can  
40 induce cell migration using repulsive or attractive cues in a context-dependent manner. In the  
41 developing mouse, Slit-Robo signaling provides a repulsive corridor to prevent migrating axons from  
42 straying from their path during innervation (Brose et al., 1999; Dickson and Gilestro, 2006). Slit-Robo  
43 binding inactivates Rho GTPases, inhibiting actin polymerization and driving the cell away from the  
44 direction of the Slit signal (Wu et al., 2017; Ypsilanti et al., 2010). Conversely, Slit uses attractive cues to  
45 promote vascular development and angiogenesis. In this context, Slit-Robo interactions activate Rho  
46 GTPases, inducing actin polymerization in the direction of the Slit signal (Rama et al., 2015; Wu et al.,  
47 2017; Ypsilanti et al., 2010; Zhang et al., 2009). While Slit and Robo are a canonical signaling pair, both

48 components have alternative binding partners; Slit ligands are able to bind semaphorins, ephrins,  
49 plexin, and neuronatin to regulate cell migration and metabolic function in specific tissues (Brose et al.,  
50 1999; Delloye-Bourgeois et al., 2015; Svensson et al., 2016; Wright et al., 2012). Robo receptors are  
51 able to bind the fibronectin leucine rich transmembrane protein 3 (FLIRT3), and are capable of forming  
52 homodimers to induce axonal growth (Hivert, 2002; Leyva-Díaz et al., 2014; Tong et al., 2019).  
53 We have recently described a role for Robo receptors in pancreatic islet architecture (Adams et al.,  
54 2018). Specifically, we showed that genetic deletion of *Robo1* and *Robo2* in  $\beta$ -cells (*Robo*  $\beta$ KO) results  
55 in loss of stereotypic murine islet architecture, without affecting  $\beta$ -cell differentiation or maturation.  
56 These Robo-depleted islets have a marked invasion of  $\alpha$ - and  $\delta$ -cells into the  $\beta$ -cell core. Given the  
57 conserved role of Slits as the canonical Robo ligands and our recent findings that Robo receptors  
58 regulate endocrine cell type sorting in the islet, we set to investigate the role of Slit ligands in islet  
59 morphogenesis.

60

## 61 **Results**

### 62 ***Slits ligands are expressed in different compartments in the developing mouse pancreas.***

63 To test the hypothesis that Slits are involved in Robo-mediated control of islet architecture during  
64 development, we first examined whether any of the Slit ligands are expressed in the pancreas at the  
65 time of islet morphogenesis. We queried a gene expression database, generated by Krentz and  
66 colleagues (Krentz et al., 2018), which contains single-cell RNA-Seq data from embryonic mouse  
67 pancreata. We found that *Slit1* expression is present in a subset of endocrine progenitor cells at  
68 embryonic day (E)15.5, and becomes enriched in  $\beta$ -cells by E18.5. *Slit2* and *Slit3* expression is

69 distributed between pancreatic mesenchyme, acinar, and ductal cell types with negligible expression in  
70 the endocrine compartment at both time points (Figure 1).

71 To confirm the expression of Slits in the pancreas *in vivo*, we analyzed pancreata from *Slit1<sup>GFP</sup>*, *Slit2<sup>GFP</sup>*,  
72 and *Slit3<sup>LacZ</sup>* mice, which have knock-in reporters at their respective endogenous Slit loci (Plump et al.,  
73 2002; Yuan et al., 2003). We identified strong GFP expression in *Slit1<sup>GFP/+</sup>* mice both in E18.5 and adult  
74 islets. This staining pattern overlapped with insulin, indicating that *Slit1* is expressed in  $\beta$ -cells at both  
75 stages (Figure 2A). We did not detect *Slit2<sup>GFP</sup>* (Figure 2A) or *Slit3<sup>LacZ</sup>* (Figure 2B) in either the embryonic  
76 or the adult islets. However, *Slit3<sup>LacZ</sup>* expression was detected in pancreatic tissues outside of the islet  
77 (Figure 2B). *Slit2<sup>GFP</sup>* expression was seen in other tissues, indicating that the lack of *Slit2<sup>GFP</sup>* signal in the  
78 developing pancreas is not caused by a problem with the reporter (Supplementary Figure 1). A  
79 previous report by Escot and colleagues identified *Slit3* expression in the developing pancreatic  
80 mesenchyme (Escot et al., 2018). While we were not able to detect *Slit2<sup>GFP</sup>* expression, data from  
81 single-cell RNA Sequencing (scRNAseq) indicates that it is also expressed in pancreatic mesenchyme  
82 during development (Krentz et al., 2018). We concluded that *Slit1* is the predominant Slit expressed  
83 inside the islets, and that *Slit3* and perhaps *Slit2* are expressed outside of the islet during pancreatic  
84 development.

85  
86 ***Loss of a single Slit ligand does not compromise islet architecture.***

87 Slit and Robo are conserved binding partners, and loss of Robo in the islets of *Robo*  $\beta$ KO mice results in  
88 severely altered islet architecture (Adams et al., 2018). We hypothesized that if Slits mediate Robo-  
89 regulated islet architecture, then eliminating Slit expression would phenocopy the islet organization  
90 defects in *Robo*  $\beta$ KO islets. Whole-body *Slit1*-null (*Slit1<sup>GFP/GFP</sup>*) and *Slit3*-null (*Slit3<sup>LacZ/LacZ</sup>*) mice are viable

91 to adulthood. We performed positional cell counting on the islets of these mice as previously described  
92 (Adams et al., 2018) to determine whether these mutants exhibited islet organizational defects. In  
93 contrast to the phenotype seen in *Robo*  $\beta$ KO islets, individual *Slit1* or *Slit3* mutant islets display  
94 completely normal architecture (Figure 3A-C).  $\alpha$ -,  $\beta$ -, and  $\delta$ -cells remain restricted to their respective  
95 niches; the  $\beta$ -cells reside in the core, while the  $\alpha$ - and  $\delta$ -cells remain in the islet mantle. We also found  
96 no significant difference between control islets and *Slit1* or *Slit3* mutant islets in islet size (Figure 3D) or  
97 circularity (Figure 3E). Whole-body *Slit2*-null (*Slit2*<sup>GFP/GFP</sup>) animals die shortly after birth. We thus  
98 examined pancreata of E18.5 *Slit2*<sup>GFP/GFP</sup> embryos. Evidence of altered islet architecture in *Robo*  $\beta$ KO  
99 mutants can be seen at E18.5; however, we did not observe overt defects in the architecture of  
100 *Slit2*<sup>GFP/GFP</sup> islets at this time point (Figure 3F). Taken together, these results indicate that individual Slits  
101 are either not required for, or compensate for each other in, Robo-mediated control of islet  
102 architecture.

103

#### 104 ***Slit2 and Slit3 compensate for each other and are required for islet morphogenesis.***

105 Slit ligands are highly similar in amino acid sequence, particularly in their Robo-binding domains (Figure  
106 4A). Thus, it is possible that the different Slit ligands compensate for each other during islet  
107 morphogenesis. We tested the extent to which multiple Slit ligands are required for islet architecture  
108 by analyzing islet formation in combinatorial Slit mutants. *Slit1*<sup>GFP/GFP</sup>;*Slit3*<sup>LacZ/LacZ</sup> double knockouts live  
109 to adulthood and appear normal, with no detectable alterations in islet architecture, size, or circularity  
110 (Figure 4B-F). To circumvent the neonatal lethality of *Slit2*<sup>GFP/GFP</sup> mice, we analyzed the pancreata of  
111 *Slit1/2* knockouts (*Slit1*<sup>GFP/GFP</sup>;*Slit2*<sup>GFP/GFP</sup>), *Slit2/3* knockouts (*Slit2*<sup>GFP/GFP</sup>;*Slit3*<sup>LacZ/LacZ</sup>), and *Slit1/2/3*  
112 knockouts (*Slit1*<sup>GFP/GFP</sup>;*Slit2*<sup>GFP/GFP</sup>;*Slit3*<sup>LacZ/LacZ</sup>) at E18.5 or P0. *Slit1/2* knockout islets show no indications

113 of altered architecture, but *Slit2/3* and *Slit1/2/3* knockouts have disorganized islets (Figure 4G). To  
114 quantify this phenotype, we scored islets as either intact (insulin-positive cells surrounded by glucagon-  
115 positive cells), intermediate (clusters of insulin-positive cells disrupted by glucagon-positive or non-  
116 endocrine cells), or disrupted (single cells or clusters of endocrine cells that are not forming islet  
117 structures) (Figure 4H). Double-blinded scoring of islets from the above genotypes revealed that wild  
118 type and *Slit1/2* knockouts have few disrupted islets and similar percentages of intact and intermediate  
119 islets (*WT* intact: 49%, intermediate: 40%, disrupted: 11%. *Slit1/2 KO* intact: 43%, intermediate: 46%,  
120 disrupted: 11%). On the other hand, *Slit2/3* and *Slit1/2/3* knockouts had very few intact islets and  
121 increased numbers of intermediate and disrupted islets (*Slit2/3 KO* intact: 8%, intermediate: 53%,  
122 disrupted: 39%. *Slit1/2/3 KO* intact: 8%, intermediate: 60%, disrupted: 32%). Taken together, the data  
123 suggest that *Slit1* (expressed in the islet itself) is dispensable, while *Slit2* and *Slit3* (expressed outside of  
124 the islet) compensate for each other and are required for proper islet formation.

125

### 126 ***Slits act as repellent factors to influence $\beta$ cell migration***

127 Because *Slit2/3* and *Slit1/2/3* mutant islets are disrupted and do not cluster tightly, we wondered  
128 whether this indicates failure of  $\beta$ -cells to migrate properly during islet morphogenesis. To test this  
129 hypothesis, we performed Transwell cell migration assays using INS-1 cells. INS-1 cells seeded in the  
130 top chamber of a cell culture insert above INS-1 conditioned media showed strong migratory activity,  
131 while INS-1 cells seeded above fresh, untreated INS-1 culture media did not (Figure 5A-C). INS-1 cells  
132 seeded above conditioned media supplemented with 2.5 $\mu$ g recombinant SLIT1, SLIT2, and SLIT3  
133 displayed a significantly reduced ability to migrate (Figure 5B,C), suggesting that Slits influence  $\beta$ -cell  
134 migration through cell-cell repulsion mechanisms during islet morphogenesis.

135

136 **Discussion**

137 In this study, we demonstrate that Slit ligands are required for pancreatic islet architecture.  
138 Simultaneous loss of all three Slits results in a disrupted, “islet explosion-like” phenotype, which is also  
139 observed in *Slit2*<sup>GFP/GFP</sup>;*Slit3*<sup>LacZ/LacZ</sup> knockouts. These findings lead us to conclude that Slit1 is  
140 dispensable for, and that *Slit2* and *Slit3* are required for and have redundant roles in, islet  
141 morphogenesis.

142 The exact mechanism of Slits in islet morphogenesis is unknown; however, the expression pattern of  
143 Robo in the pancreas provides some clues. Slit and Robo are ligand-receptor binding partners in the  
144 Slit-Robo signaling pathway. During mammalian development, Slit and Robo occupy adjacent tissues,  
145 specifying complimentary expression patterns in the developing organism (Yuan et al., 1999). While all  
146 three Slits have expression patterns unique to their specific domain, they also have overlapping regions  
147 of expression, suggesting some genetic redundancy. Interestingly, *Slit2* and *Slit3* share more expression  
148 domains with each other than either of them do with *Slit1* (Yuan et al., 1999). We have observed a  
149 similar framework in the mouse pancreas: *Robo* is primarily expressed in endocrine cells (Adams et al.,  
150 2018), while *Slit2* and *Slit3* have overlapping expression patterns in pancreatic mesenchyme. These  
151 complimentary and overlapping regions of expression are hallmarks of ligand-receptor binding  
152 partners, and suggest that mesenchymal Slit2 and Slit3 interact with endocrine Robo to coordinate islet  
153 morphogenesis. We propose that Slit2/3 signals from the mesenchyme are picked up by Robo  
154 receptors on the surface of developing islet endocrine cells. These endocrine cells are then repelled  
155 away from the direction of the Slit signal, allowing for islet clustering to occur. Loss of this signal results  
156 in a failure of islet morphogenesis, thus the “islet explosion” phenotype described above. It is likely



157 that Slits are not the only signal required for morphogenesis, as some of the islets in  
158 *Slit2*<sup>GFP/GFP</sup>;*Slit3*<sup>LacZ/LacZ</sup> and triple knockout animals showed evidence of appropriate clustering. Future  
159 work will determine whether other ligands or even Robo-Robo interactions are involved in islet  
160 morphogenesis.

161 It is commonly held that islet morphogenesis is outlined by delamination of endocrine progenitors  
162 from the pancreatic duct, followed by their migration as individual cells through the mesenchyme and  
163 aggregation into islets (Pan and Wright, 2011), implying that  $\beta$ -cells respond to attractive cues from the  
164 islets. Indeed, we have observed strong Transwell migration of  $\beta$ -cells towards their own conditioned  
165 medium, demonstrating that  $\beta$ -cells are attracted towards  $\beta$ -cells. However, we further provide  
166 evidence to suggest mesenchymal Slits repel  $\beta$ -cells during islet morphogenesis. These results are in  
167 support of the recent observation that endocrine progenitors remain physically connected throughout  
168 islet morphogenesis (Sharon et al., 2019), and suggest that after  $\beta$ -cell delamination, repulsion of the  
169  $\beta$ -cells by mesenchymal Slits pushes them into the center of the islet, thus maintaining the core-mantle  
170 architecture. Taken together, we propose that both attractive and repulsive signals operate together in  
171 forming the canonical murine islet architecture.

172 The role of *Slit1* in islet morphogenesis remains elusive. The islet architecture phenotypes seen in  
173 *Slit2*<sup>GFP/GFP</sup>;*Slit3*<sup>LacZ/LacZ</sup> animals are not significantly different in triple knockouts, suggesting that *Slit1*  
174 does not have any influence on islet architecture. In addition, *Slit1* expression does not overlap with  
175 *Slit2* or *Slit3*, thus it is unlikely to be redundant. Moreover, *Slit1* is strongly expressed in a subset of  $\beta$ -  
176 cells both during development and in the adult. Slits have been previously demonstrated to provide a  
177 protective effect on  $\beta$ -cells, as well as potentiate insulin secretion (Yang et al., 2013). It is thus plausible  
178 that *Slit1* is tasked with the protective and secretory roles in the islet, while the transient expression of

179 *Slit2* and *Slit3* in the mesenchyme during development is responsible for islet morphogenesis. How the  
180 expression of *Slit1* in  $\beta$ -cells does not interfere with the function of *Slit2* and *Slit3* from the  
181 mesenchyme during islet morphogenesis is intriguing, and remains to be elucidated.

182 **Methods**

183 Animals

184 All animal experiments were conducted in accordance with the University of Wisconsin-Madison IACUC  
185 guidelines under approved protocol #M005221. *Robo1<sup>-/-</sup>;Robo2<sup>flx</sup>* (Branchfield et al., 2016), *Ins2-Cre*  
186 (Postic et al., 1999), *H2B-mCherry* (Blum et al., 2014), *Slit1<sup>GFP</sup>*, *Slit2<sup>GFP</sup>* (Plump et al., 2002), *Slit3<sup>LacZ</sup>*  
187 (Yuan et al., 2003) alleles have been previously described.

188

189 Expression Analysis

190 tSNE plots of sc-RNA Seq obtained from the Lynn Lab's Single Cell Gene Expression Atlas  
191 ([https://lynnlab.shinyapps.io/embryonic\\_pancreas/](https://lynnlab.shinyapps.io/embryonic_pancreas/)) (Krentz et al., 2018).

192

193 Immunostaining

194 Pancreata were dissected from adult (~8week old), embryonic (E18.5), or newborn (P0) mice, fixed in  
195 4% paraformaldehyde for 1 hour at room temperature (20-30 minutes for E18.5 and P0), preserved in  
196 30% sucrose, embedded in OCT (Leica), then sectioned onto slides. Slides were stained according to  
197 the following protocol: 1 hour block in 10% Normal Donkey Serum in PBST, 1 hour primary antibody  
198 incubation, 3x10 min PBST washes, 1 hour secondary antibody incubation in dark, 3x10 min PBST  
199 washes, mount slides in Fluoromount-G (Thermo Fisher). The following primary antibodies were used:  
200 Guinea Pig anti-Insulin 1:800 (Dako), Guinea Pig anti-Insulin pre-diluted 1:6 (Dako 1R002), Chicken anti-  
201 GFP 1:1000 (Abcam ab13970), Rabbit anti-Glucagon 1:200 (Cell Signaling 2760), Goat anti-Somatostatin  
202 1:50 (Santa Cruz), Rabbit anti-Somatostatin 1:800 (Phoenix G-060-03), DAPI 1:10,000 (Sigma 9542). The

203 following secondary antibodies were used at 1:500: Alexa 647 anti-Guinea Pig, Alexa 594 anti-Rabbit,  
204 Alexa 594 anti-Goat, Alexa 488 anti-Rabbit, Alexa 488 anti-Chicken.

205 For eye analysis, tissues were dissected and fixed in 4% paraformaldehyde for 2 hours at 4°C. Tissues  
206 were preserved in a series of sucrose solutions (10%, 20% sucrose) for 1.5 hours each. Tissues were  
207 further preserved in 30% sucrose overnight, embedded in OCT, then sectioned and stained as above.

208 For  $\beta$ -galactosidase staining, tissues were fixed in 4% paraformaldehyde for 1 hour at room  
209 temperature (or 20-30 minutes for E18.5 tissue). Fixed tissues were stained with X-gal solution (Roche  
210 11828673001) for 22 hours at 37°C, then preserved, embedded, and sectioned as above. Insulin  
211 staining on these tissues was done using the Vectastain ABC HRP kit (Vector Labs PK-4007), NovaRED  
212 kit (Vector Labs SK-4800), and mounted with VectaMount (Vector Labs H-5000). Slides for expression  
213 analysis imaged using a Zeiss Axio Observer Z1.

214

215 Cell Counting, Shape, Size Analysis

216 Slides used for cell counting or shape and size analysis were imaged on a Nikon A1RS confocal  
217 microscope. Confocal z-stacks were converted to maximum intensity projected images. The number of  
218  $\alpha$ - and  $\delta$ - cells were counted using the ImageJ Cell Counter tool.  $\alpha$ - or  $\delta$ - cells were considered in the  
219 islet periphery if they were within the first two cell layers of the islet. For shape and size analysis, islets  
220 were outlined and a threshold was applied in ImageJ. The Analyze Particles tool then gave readout of  
221 islet size in  $\mu\text{m}^2$  and a circularity score (between 0-1, where 1 indicates a perfect circle). A minimum of  
222 10 islets were analyzed across at least three different tissue sections per mouse. Analysis performed on  
223  $n=3$  mice for each genotype.  $\alpha$ - and  $\delta$ -cell percentages, islet size, and islet circularity values were  
224 averaged for each mouse and plotted in Prism.

225

## 226 Amino Acid Alignment

227 Amino acid sequence and domain information were obtained from Yuan et al., 1999. Pairwise  
228 alignment scores of amino acid sequences were provided by ClustalW ([https://www.genome.jp/tools-](https://www.genome.jp/tools-bin/clustalw)  
229 [bin/clustalw](https://www.genome.jp/tools-bin/clustalw)).

230

## 231 Islet Scoring

232 Islet scoring was performed on images of tissue sections stained for insulin, glucagon, and DAPI. Z-stack  
233 images were converted to maximum intensity projected images, and randomly assigned a number  
234 identifier. Four independent trials (by four different researchers) of double-blinded scoring was  
235 performed on 197 images, comprising at least 10 images spanning four different tissue sections per  
236 mouse, and at least 3 mice per genotype.

237

## 238 Transwell Cell Migration Assay

239 INS-1 cells (AddexBio) were maintained in culture media containing RPMI-1640 (ThermoFisher), 10%  
240 FBS, 1% penicillin/streptomycin, and supplemented with 0.05mM  $\beta$ -mercaptoethanol. Cells were  
241 seeded at a density of 250,000 cells/mL in Transwell cell culture inserts with 8 $\mu$ M pores (Sigma).  
242 Inserts were placed into wells containing either 700 $\mu$ L culture media, 700 $\mu$ L INS-1 conditioned media,  
243 or 700 $\mu$ L INS-1 conditioned media supplemented with 2.5 $\mu$ g each recombinant SLIT1, SLIT2, and SLIT3  
244 (R&D Systems) and cultured at 37°C for 48 hours. Inserts were then fixed in 4% paraformaldehyde for  
245 20 minutes, unmigrated cells were wiped off the top of the insert, and then inserts were incubated in  
246 0.08% crystal violet and a 1:1,000 concentration of DAPI to visualize the cells. Nine non-overlapping

247 field of view images were taken for each insert. Three images per insert were chosen at random for  
248 quantification. Results are reported as the average number of cells that migrated per field of view.

249

#### 250 Statistical Analysis

251 All data reported as mean  $\pm$ SEM unless otherwise indicated. P-values calculated using Student's T-test  
252 in Prism GraphPad 7 unless otherwise indicated. Any p-value <0.05 was considered significant and  
253 marked with an asterisk.

254

#### 255 **Author Contributions**

256 Conceptualization, B.B. and J.M.G; Methodology, B.B. and J.M.G; Investigation, J.M.G, M.T.A., N.S, and  
257 H.J.; Formal Analysis, J.M.G, M.T.A., N.S, and H.J.; Writing Original Draft, B.B and J.M.G.; Writing,  
258 Review and Editing, all authors; Funding Acquisition, B.B.; Supervision, B.B.

259

#### 260 **Acknowledgements**

261 We thank members of the Blum lab, especially Bayley Waters and Dex Nimkulrat for valuable  
262 discussion and comments on the manuscript. We thank Le Ma, David Ornitz, Alain Chedotal, and Marc  
263 Tessier-Lavigne for mice. We are grateful to Francis Lynn and Nicole Krentz for allowing us to use their  
264 scRNA-seq data, and to Cody Frederickson for help generating figures. We are also grateful to Lance  
265 Rodenkirch and the UW-Madison Optical Imaging Core for help with imaging. This work was funded in  
266 part by the following grants. R01DK121706 from the NIDDK, the DRC at Washington University Pilot  
267 Grant P30DK020579, and Pilot Award UL1TR000427 from the UW-Madison Institute for Clinical and  
268 Translational Research (ICTR). JMG and MTA were funded by 5T32GM007133-44, a graduate training

269 award from the UW-Madison Stem Cell & Regenerative Medicine Center, and an Advanced  
270 Opportunity Fellowship through SciMed Graduate Research Scholars at UW-Madison.

271 **References**

272

273 **Adams, M. T., Gilbert, J. M., Hinojosa Paiz, J., Bowman, F. M. and Blum, B.** (2018). Endocrine cell type

274 sorting and mature architecture in the islets of Langerhans require expression of Roundabout

275 receptors in  $\beta$  cells. *Sci. Rep.* **8**, 10876.

276 **Baetens, D., Stefan, Y., Ravazzola, M., Malaisse-Lagae, F., Coleman, D. L. and Orci, L.** (1978).

277 Alteration of islet cell populations in spontaneously diabetic mice. *Diabetes* **27**, 1–7.

278 **Blockus, H. and Chédotal, A.** (2016). Slit-Robo signaling. *Development* **143**, 3037–3044.

279 **Blum, B., Roose, A. N., Barrandon, O., Maehr, R., Arvanites, A. C., Davidow, L. S., Davis, J. C.,**

280 **Peterson, Q. P., Rubin, L. L. and Melton, D. A.** (2014). Reversal of  $\beta$  cell de-differentiation by a

281 small molecule inhibitor of the TGF $\beta$  pathway. *Elife* **3**, e02809.

282 **Branchfield, K., Nantie, L., Verheyden, J. M., Sui, P., Wienhold, M. D. and Sun, X.** (2016). Pulmonary

283 neuroendocrine cells function as airway sensors to control lung immune response. *Science* **351**,

284 707–710.

285 **Brose, K., Bland, K. S., Wang, K. H., Arnott, D., Henzel, W., Goodman, C. S., Tessier-lavigne, M., Kidd,**

286 **T., Way, D. N. A. and Francisco, S. S.** (1999). Slit Proteins Bind Robo Receptors and Have an

287 Evolutionarily Conserved Role in Repulsive Axon Guidance. *Cell* **96**, 795–806.

288 **Cabrera, O., Berman, D. M., Kenyon, N. S., Ricordi, C., Berggren, P.-O. and Caicedo, A.** (2006). The

289 unique cytoarchitecture of human pancreatic islets has implications for islet cell function. *Proc.*

290 *Natl. Acad. Sci. U. S. A.* **103**, 2334–9.

291 **Chédotal, A.** (2007). Slits and their receptors. *Adv. Exp. Med. Biol.* **621**, 65–80.

292 **Delloye-Bourgeois, C., Jacquier, A., Charoy, C., Reynaud, F., Nawabi, H., Thoinet, K., Kindbeiter, K.,**

293 **Yoshida, Y., Zagar, Y., Kong, Y., et al.** (2015). PlexinA1 is a new Slit receptor and mediates axon



- 294 guidance function of Slit C-terminal fragments. *Nat. Neurosci.* **18**, 36–45.
- 295 **Dickson, B. J. and Gilestro, G. F.** (2006). Regulation of Commissural Axon Pathfinding by Slit and its  
296 Robo Receptors. *Annu. Rev. Cell Dev. Biol.* **22**, 651–675.
- 297 **Escot, S., Willnow, D., Naumann, H., Di Francescantonio, S. and Spagnoli, F. M.** (2018). Robo signalling  
298 controls pancreatic progenitor identity by regulating Tead transcription factors. *Nat. Commun.* **9**,  
299 5082.
- 300 **Hivert, B.** (2002). Robo1 and Robo2 Are Homophilic Binding Molecules That Promote Axonal Growth.  
301 *Mol. Cell. Neurosci.* **21**, 534–545.
- 302 **Kilimnik, G., Zhao, B., Jo, J., Periwal, V., Witkowski, P. and Misawa, R.** (2011). Altered Islet  
303 Composition and Disproportionate Loss of Large Islets in Patients with Type 2 Diabetes. *PLoS One*  
304 **6**, e27445.
- 305 **Kim, A., Miller, K., Jo, J., Kilimnik, G., Wojcik, P. and Hara, M.** (2009). Islet architecture: A comparative  
306 study. *Islets* **1**, 129–136.
- 307 **Krentz, N. A., Lee, M., Xu, E. E., Sasaki, S. and Lynn, F. C.** (2018). Single cell transcriptome profiling of  
308 mouse and hESC-derived pancreatic progenitors. *Stem Cell Reports* **11**, 1551-1564.
- 309 **Pan, F. C. and Wright, C.** (2011). Pancreas organogenesis: From bud to plexus to gland. *Dev. Dyn.* **240**,  
310 530–565.
- 311 **Plump, A. S., Erskine, L., Sabatier, C., Brose, K., Epstein, C. J., Goodman, C. S., Mason, C. A. and**  
312 **Tessier-Lavigne, M.** (2002). Slit1 and Slit2 cooperate to prevent premature midline crossing of  
313 retinal axons in the mouse visual system. *Neuron* **33**, 219–232.
- 314 **Postic, C., Shiota, M., Niswender, K. D., Jetton, T. L., Chen, Y., Moates, J. M., Shelton, K. D., Lindner,**  
315 **J., Cherrington, A. D. and Magnuson, M. A.** (1999). Dual roles for glucokinase in glucose

- 316 homeostasis as determined by liver and pancreatic  $\beta$  cell-specific gene knock-outs using Cre  
317 recombinase. *J. Biol. Chem.* **274**, 305–315.
- 318 **Rama, N., Dubrac, A., Mathivet, T., Ní Chárthaigh, R.-A., Genet, G., Cristofaro, B., Pibouin-Fragner, L.,**  
319 **Ma, L., Eichmann, A. and Chédotal, A.** (2015). Slit2 signaling through Robo1 and Robo2 is required  
320 for retinal neovascularization. *Nat. Med.* **21**, 483–491.
- 321 **Roscioni, S. S., Migliorini, A., Gegg, M. and Lickert, H.** (2016). Impact of islet architecture on  $\beta$ -cell  
322 heterogeneity, plasticity and function. *Nat. Rev. Endocrinol.* **12**, 695–709.
- 323 **Schonhoff, S. E., Giel-Moloney, M. and Leiter, A. B.** (2004). Neurogenin 3-expressing progenitor cells in  
324 the gastrointestinal tract differentiate into both endocrine and non-endocrine cell types. *Dev. Biol.*  
325 **270**, 443–454.
- 326 **Sharon, N., Chawla, R., Mueller, J., Gifford, D. K., Trapnell, C., Melton, D., Sharon, N., Chawla, R.,**  
327 **Mueller, J., Vanderhooft, J., et al.** (2019). A Peninsular Structure Coordinates Asynchronous  
328 Differentiation with Morphogenesis to Generate Pancreatic Islets. *Cell.* **176**, 790-804.
- 329 **Steiner, D. J., Kim, A., Miller, K. and Hara, M.** (2010). Pancreatic islet plasticity: Interspecies  
330 comparison of islet architecture and composition. *Islets* **2**, 135-145.
- 331 **Svensson, K. J., Long, J. Z., Jedrychowski, M. P., Cohen, P., Lo, J. C., Serag, S., Kir, S., Shinoda, K.,**  
332 **Tartaglia, J. A., Rao, R. R., et al.** (2016). A secreted slit2 fragment regulates adipose tissue  
333 thermogenesis and metabolic function. *Cell Metab.* **23**, 454–466.
- 334 **Tong, M., Jun, T., Nie, Y., Hao, J. and Fan, D.** (2019). The role of the SLIT/Robo signaling pathway. *J.*  
335 *Cancer* **10**, 2694–2705.
- 336 **Wright, K. M., Lyon, K. A., Leung, H., Leahy, D. J., Ma, L. and Ginty, D. D.** (2012). Dystroglycan  
337 Organizes Axon Guidance Cue Localization and Axonal Pathfinding. *Neuron* **76**, 931–944.

- 338 **Wu, M. F., Liao, C. Y., Wang, L. Y. and Chang, J. T.** (2017). The role of Slit-Robo signaling in the  
339 regulation of tissue barriers. *Tissue Barriers* **5**, 1–17.
- 340 **Yang, Y. H. C., Manning Fox, J. E., Zhang, K. L., MacDonald, P. E. and Johnson, J. D.** (2013). Intraislet  
341 SLIT-ROBO signaling is required for beta-cell survival and potentiates insulin secretion. *Proc. Natl.*  
342 *Acad. Sci. U. S. A.* **110**, 16480–5.
- 343 **Ypsilanti, A. R. and Chedotal, A.** (2014). Roundabout receptors. *Adv. Neurobiol.* **8**, 133–64.
- 344 **Ypsilanti, A. R., Zagar, Y. and Chedotal, A.** (2010). Moving away from the midline: new developments  
345 for Slit and Robo. *Development* **137**, 1939–1952.
- 346 **Yuan, W., Zhou, L., Chen, J. H., Wu, J. Y., Rao, Y. and Ornitz, D. M.** (1999). The mouse SLIT family:  
347 secreted ligands for ROBO expressed in patterns that suggest a role in morphogenesis and axon  
348 guidance. *Dev. Biol.* **212**, 290–306.
- 349 **Yuan, W., Rao, Y., Babiuk, R. P., Greer, J. J., Wu, J. Y. and Ornitz, D. M.** (2003). A genetic model for a  
350 central (septum transversum) congenital diaphragmatic hernia in mice lacking Slit3. *Proc Natl*  
351 *Acad Sci USA* **100**, 5217–5222.
- 352 **Zhang, B., Dietrich, U. M., Geng, J. G., Bicknell, R., Esko, J. D. and Wang, L.** (2009). Repulsive axon  
353 guidance molecule Slit3 is a novel angiogenic factor. *Blood* **114**, 4300–4309.

354

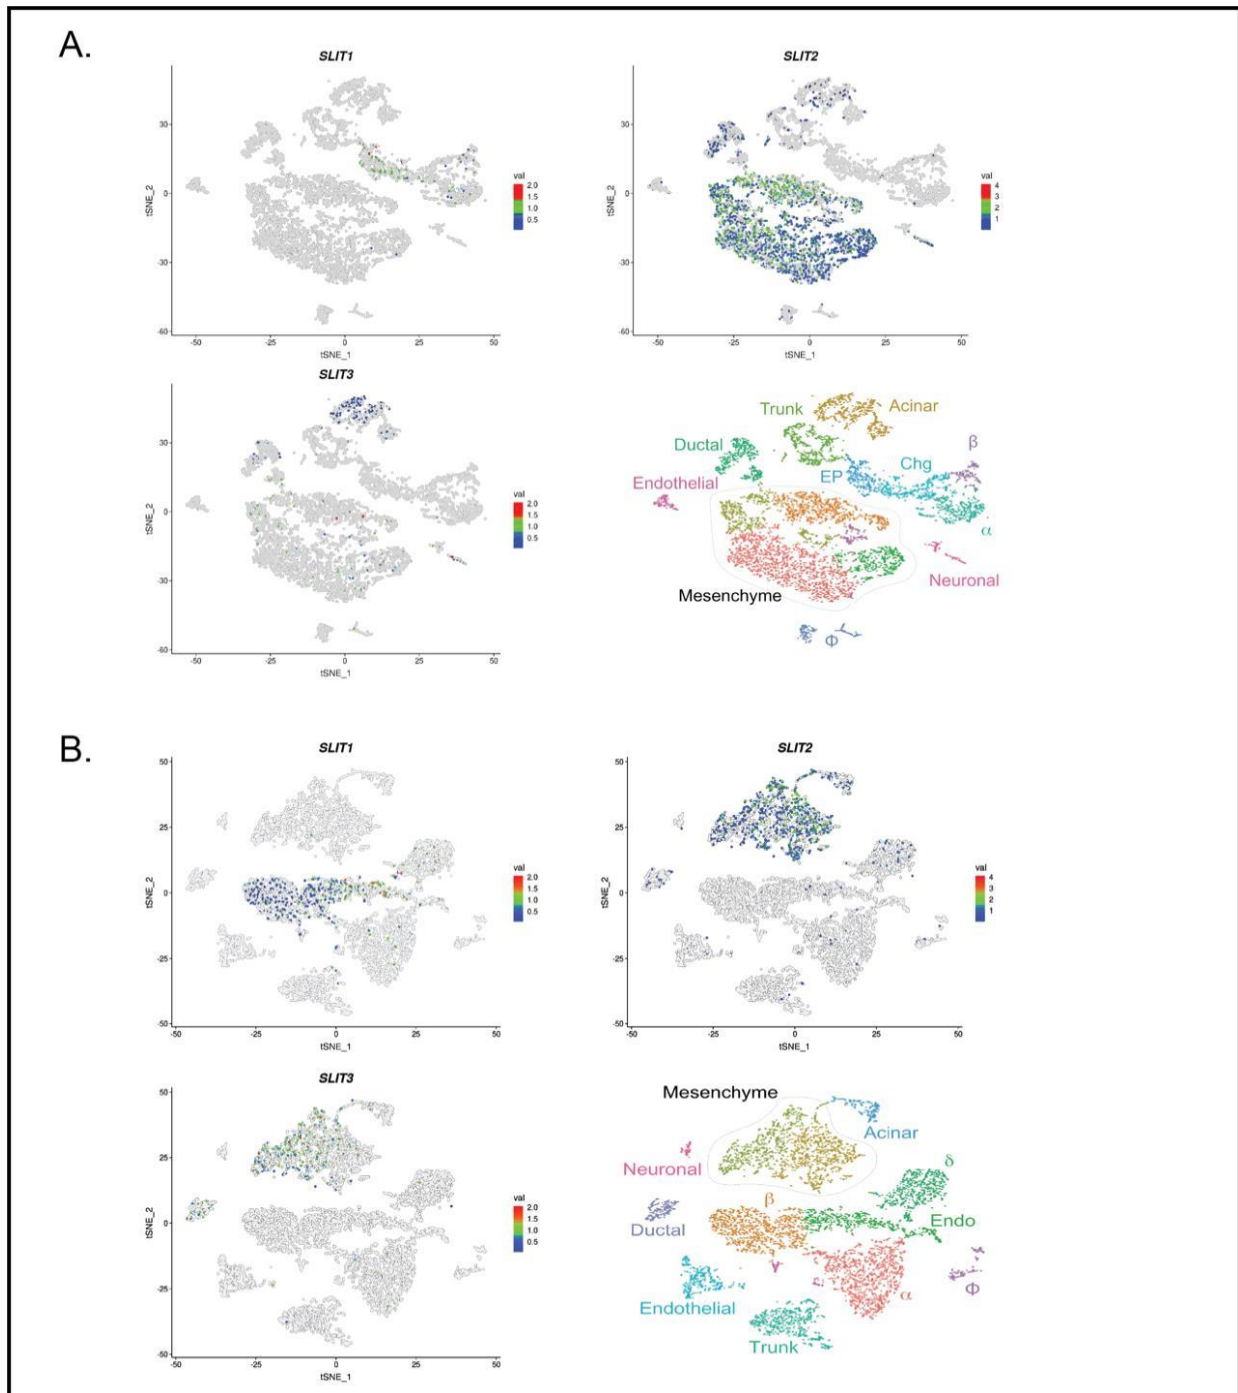

**Figure 1: Slit transcripts are expressed in different compartments in the developing murine pancreas.** Single-cell RNA-Seq data (scRNA-Seq) adapted from Krentz and colleagues (Krentz et al. 2018). tSNE plots depicting *Slit1*, *Slit2*, and *Slit3* expression in pancreatic cells. Time points analyzed are E15.5 (A) and E18.5 (B). *Slit1* is restricted to the endocrine compartment, while *Slit2* and *Slit3* localize with the mesenchyme/acinar compartment.

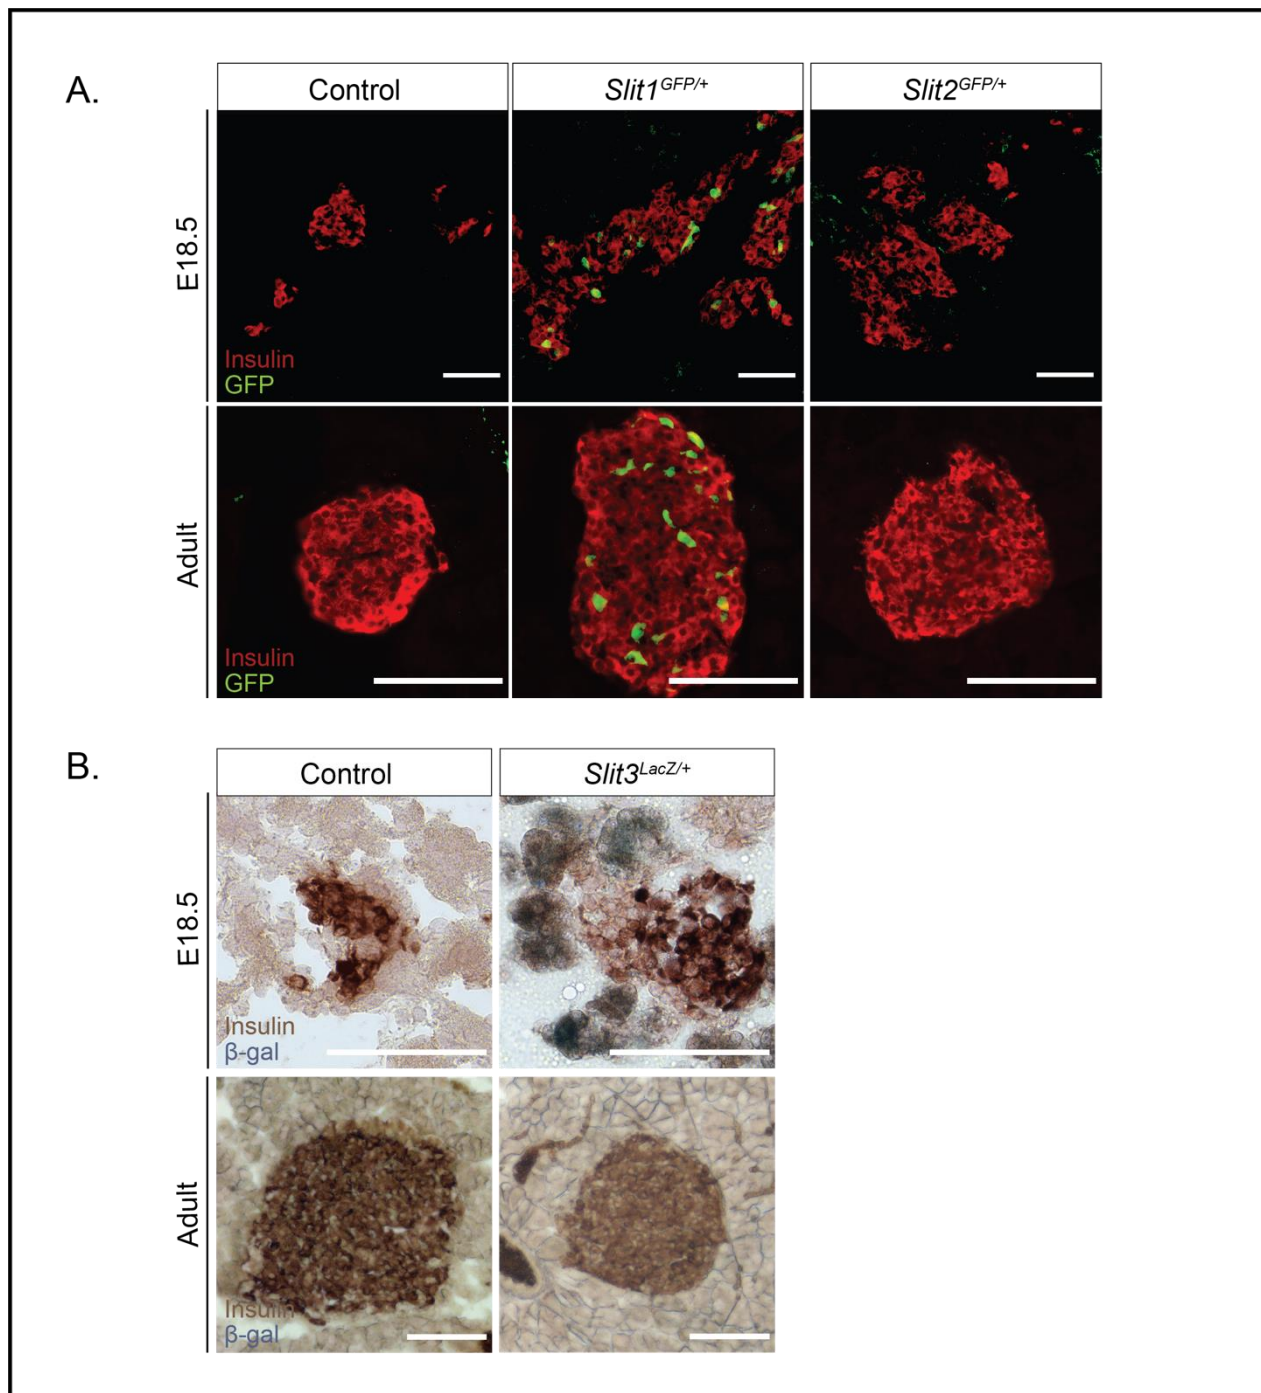

**Figure 2: *Slit1*, but not *Slit2* or *Slit3*, is expressed in the mouse islet from embryonic stages to adulthood.** (A) Immunofluorescence staining of  $\beta$ -cells (Insulin, red) and *Slit1*, *Slit2* (GFP, green) in E18.5 and adult heterozygous knock-in mice. (B)  $\beta$ -gal staining of *Slit3* (*LacZ*, blue) in E18.5 and adult heterozygous knock-in mice.  $\beta$ -gal staining (*Slit3* expression) is apparent in non-endocrine tissue surrounding the islet in the embryo. Scale bar = 100 microns.

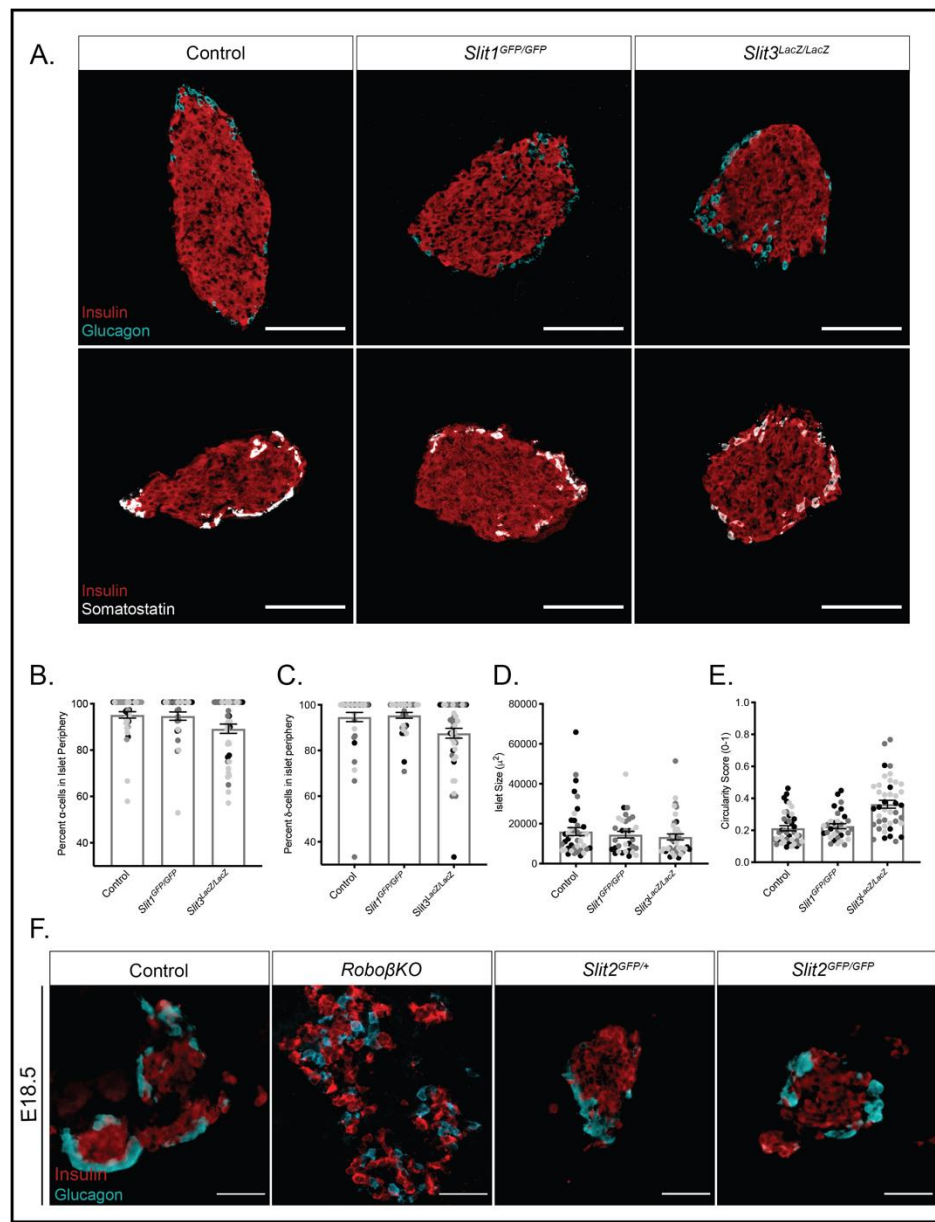

**Figure 3: Loss of a single Slit ligand does not compromise islet architecture.** (A) Immunofluorescence staining of  $\beta$ -cells (Insulin, red),  $\alpha$ -cells (Glucagon, cyan) and  $\delta$ -cells (Somatostatin, white) in adult (~8 week old) homozygous knockout mice. Scale bar = 100 microns. (B) Percentage of  $\alpha$ -cells found in the islet periphery out of total  $\alpha$ -cells. (C) Percentage of  $\delta$ -cells found in the islet periphery out of total  $\delta$ -cells. (D) Average islet size (E) Average islet circularity (as noted by a circularity score of 0-1, where 1 is a perfect circle). (F) Immunofluorescence staining of  $\beta$ -cells (Insulin, red) and  $\alpha$ -cells (Glucagon, cyan) in E18.5 control, *Ins2-Cre;Robo1<sup>-/-</sup>;Robo2<sup>flx/flx</sup>*, and *Slit2* mice. Scale bar = 50 microns. Data presented as mean  $\pm$  SEM.

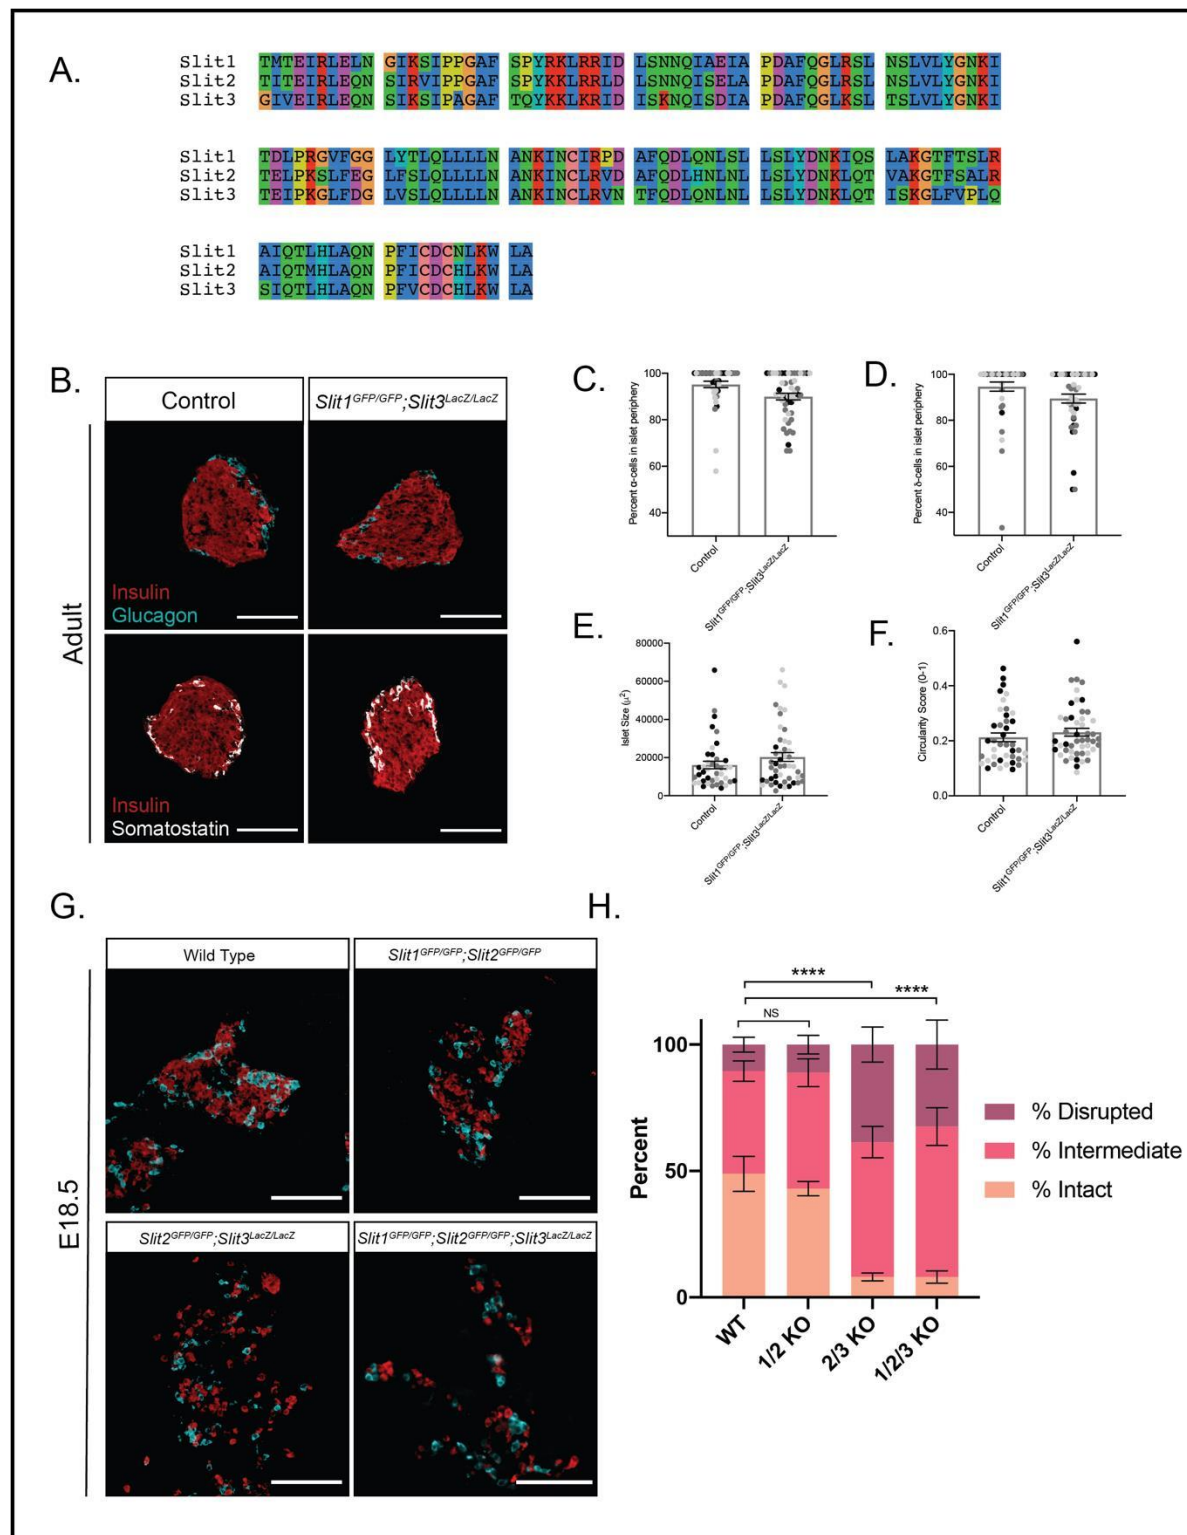

**Figure 4: *Slit2* and *Slit3* compensate for one another in islet morphogenesis.** (A) Amino acid alignment of the Robo-binding domain LRR2 (*Slit1*: 310aa-451aa, *Slit2*: 301aa-442aa, *Slit3*: 308aa-449aa) of all three murine Slits. In this region, the pairwise alignment scores are: *Slit1/Slit2*: 77%, *Slit1/Slit3*: 69%, *Slit2/Slit3*: 70%. (B) Immunofluorescence staining of  $\beta$ -cells (Insulin, red),  $\alpha$ -cells (Glucagon, cyan) and  $\delta$ -cells (Somatostatin, white) in adult (~8 week old)

homozygous *Slit1*<sup>GFP/GFP</sup>;*Slit3*<sup>LacZ/LacZ</sup> knockout mice. Scale bar = 100 microns. (C) Percentage of  $\alpha$ -cells found in the islet periphery out of total  $\alpha$ -cells. (D) Percentage of  $\delta$ -cells found in the islet periphery out of total  $\delta$ -cells. (E) Average islet size (F) Average islet circularity (as noted by a circularity score of 0-1, where 1 is a perfect circle). Data presented as mean  $\pm$ SEM. (G) Immunofluorescence staining of  $\beta$ -cells (Insulin, red) and  $\alpha$ -cells (Glucagon, cyan) in control (wild-type), double, and triple knockout mice at E18.5/P0. Scale bar = 100 microns. (H) Percentage of islets from each genotype that were scored as intact, intermediate, or disrupted. Data presented as mean  $\pm$ SEM.  $p < 0.0001$ ; Chi-square test.



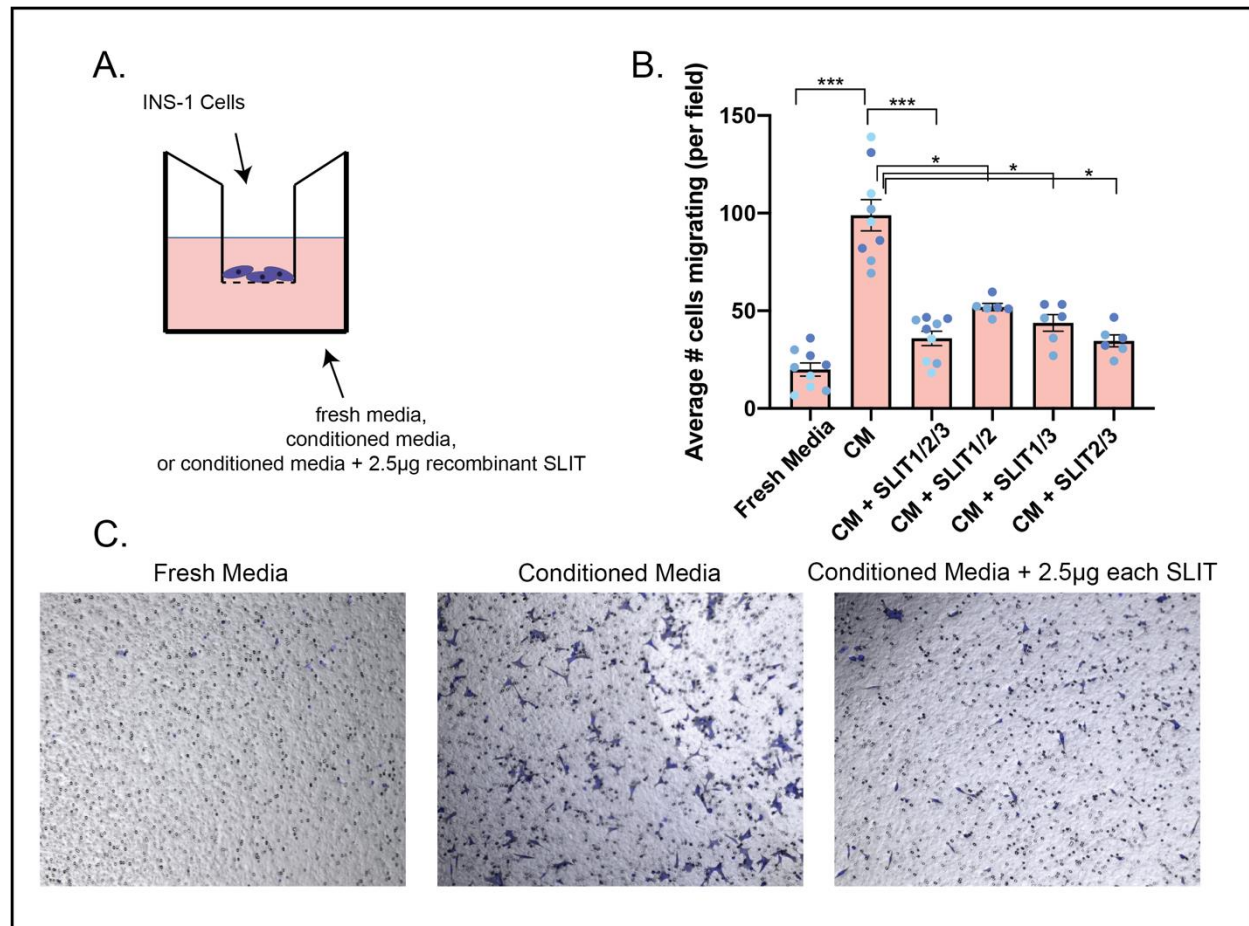

**Figure 5: Slits act as repellent factors to influence  $\beta$ -cell migration.** (A) Schematic diagram of Transwell cell migration assay. INS-1 cells were seeded in cell culture inserts over INS-1 conditioned media, fresh culture media, or INS-1 conditioned media supplemented with 2.5µg of each recombinant SLIT protein. (B) Results of cell migration assay. The average number of cells migrating per field of view is plotted. Data presented as mean  $\pm$ SEM. \*\*\* $p < 0.0005$  \* $p < 0.05$  (C) Representative images of a single field of view of a cell migration insert used in the experiments shown in (B).

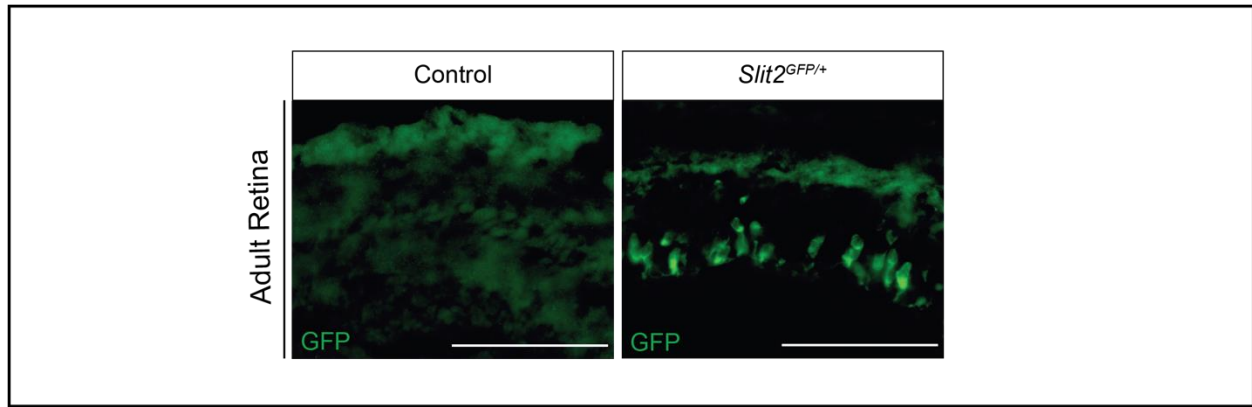

**Supplemental Figure 1: The *Slit2*<sup>GFP</sup> reporter is functional.** Immunofluorescence staining of *Slit2* (GFP, green) in retinal sections from control (wild type) or *Slit2*<sup>GFP/+</sup> heterozygous animals. Scale bar = 100 microns.
